# Supplementary material for: The atmospheric oxidation mechanism and kinetics of 1,3,5-trimethylbenzene initiated by OH radicals – a theoretical study
Source: Royal Society of Chemistry journal article supplement (doi:10.1039/c7nj01285c), 2017-01-01
Supplement: c7nj01285c1.pdf [file c7nj01285c1.pdf]

### Supporting Information

#### Atmospheric Oxidation Mechanism and Kinetics of 1, 3, 5-Trimethylbenzene Initiated by OH radical- A Theoretical Study

S. Ponnusamy, L. Sandhiya and K. Senthilkumar\*

Department of Physics, Bharathiar University, Coimbatore, India-641 046.

\*Corresponding author: Fax No: +91-422-2422387, E-Mail: [ksenthil@buc.edu.in](mailto:ksenthil@buc.edu.in)

Table S1: The relative energy ( $\Delta E$  in kcal/mol), enthalpy ( $\Delta H$  in kcal/mol) and Gibbs free energy ( $\Delta G$  in kcal/mol) for the initial reaction of 1,3,5-TMB with OH radical calculated at M06-2X, w-B97XD, MPW1K, UCCSD(T) with 6-311++G(d,p) basis set and from CBS-QB3, G3B3 and ROCBS-QB3 methods. T1-diagonestic value (T1) for the reactive species calculated at RCCSD(T)/6-311++(d,p) method.

| Species             | M06-2X     |            |            | w-B97XD    |            |            | MPW1K      |            |            | UCCSD(T)   |            |            | CBS-QB3    |            |            | G3B3       |            |            | ROCBS-QB3  |            |            | RCCSD(T)   |            |            |      |   |
|---------------------|------------|------------|------------|------------|------------|------------|------------|------------|------------|------------|------------|------------|------------|------------|------------|------------|------------|------------|------------|------------|------------|------------|------------|------------|------|---|
|                     | $\Delta E$ | $\Delta H$ | $\Delta G$ | $\Delta E$ | $\Delta H$ | $\Delta G$ | $\Delta E$ | $\Delta H$ | $\Delta G$ | $\Delta E$ | $\Delta H$ | $\Delta G$ | $\Delta E$ | $\Delta H$ | $\Delta G$ | $\Delta E$ | $\Delta H$ | $\Delta G$ | $\Delta E$ | $\Delta H$ | $\Delta G$ | $\Delta E$ | $\Delta H$ | $\Delta G$ | T1   |   |
| R                   | 0          | 0          | 0          | 0          | 0          | 0          | 0          | 0          | 0          | 0          | 0          | 0          | 0          | 0          | 0          | 0          | 0          | 0          | 0          | 0          | 0          | 0          | 0          | 0          | 0    | - |
| RC1                 | -3.3       | -5.7       | -7.6       | -2.5       | -4.1       | -6.3       | -3.5       | -5.3       | -6.8       | -4.1       | -6.8       | -8.5       | -4.8       | -7.3       | -9.8       | -5.1       | -8.0       | -9.6       | -4.1       | -6.9       | -9.6       | -3.8       | -6.2       | -8.1       | 0.01 |   |
| TS1                 | 4.7        | 6.3        | 8.9        | 9.3        | 11.6       | 13.4       | 7.2        | 8.8        | 9.3        | 6.9        | 7.2        | 8.5        | 7.3        | 8.4        | 9.9        | 6.8        | 7.95       | 9.2        | 7.6        | 9.3        | 10.0       | 6.1        | 7.8        | 8.4        | 0.02 |   |
| IC1                 | -10.6      | -12.4      | -14.7      | -8.4       | -10.3      | -12.6      | -10.8      | -11.4      | -12.5      | -10.5      | -13.5      | -14.9      | -10.3      | -12.2      | -15.3      | -12.7      | -14.2      | -16.8      | -9.3       | -11.2      | -14.8      | -9.8       | -12.3      | -13.7      | 0.02 |   |
| I1+H <sub>2</sub> O | -7.3       | -9.6       | -12.5      | -6.6       | -8.5       | -9.4       | -7.1       | -8.6       | -10.7      | -8.5       | -10.7      | -13.0      | -9.0       | -11.8      | -13.8      | -10        | -12.7      | -14.5      | -8.2       | -10.8      | -13.3      | -8.2       | -10.1      | -12.1      | 0.01 |   |
| TS2                 | 7.5        | 9.8        | 11.4       | 5.6        | 7.1        | 8.5        | 8.1        | 9.4        | 10.8       | 6.2        | 7.5        | 9.1        | 5.1        | 6.5        | 8.3        | 5.4        | 7.1        | 8.6        | 5.5        | 7.1        | 9.2        | 5.9        | 7.1        | 9.8        | 0.01 |   |
| IC2                 | -8.4       | -10.6      | -12.6      | -7.1       | -8.5       | -9.7       | -6.2       | -7.7       | -9.1       | -8.3       | -9.9       | -10.2      | -9.8       | -11.4      | -13.1      | -12.5      | -14.1      | -15.7      | -8.5       | -10.3      | -12.9      | -7.6       | -8.8       | -9.5       | 0.02 |   |
| I2+H <sub>2</sub> O | -5.7       | -7.6       | -9.3       | -4.3       | -6.5       | -7.8       | -5.8       | -8.0       | -10.5      | -7.3       | -9.1       | -10.7      | -8.4       | -10.2      | -12.4      | -9.1       | -10.8      | -12.9      | -7.6       | -9.6       | -12.1      | -6.9       | -8.2       | -11.3      | 0.01 |   |
| TS3                 | 3.1        | 5.4        | 7.2        | 4.6        | 6.8        | 8.0        | 6.5        | 5.2        | 7.4        | 4.0        | 4.4        | 5.6        | 4.6        | 5.5        | 6.5        | 2.3        | 3.8        | 5.9        | 6.3        | 7.4        | 6.7        | 4.8        | 5.1        | 6.2        | 0.02 |   |
| I3                  | -12        | -14.3      | -16.6      | -10.7      | -12.4      | -14.6      | -11.3      | -12.6      | -14.4      | -15.4      | -17.5      | -18.2      | -14.7      | -16.2      | -18.1      | -17        | -17.4      | -19.2      | -13.8      | -15.1      | -17.6      | -14.6      | -16.3      | -17.4      | 0.02 |   |
| TS4                 | 1.6        | 3.4        | 5.1        | 2.8        | 3.9        | 5.1        | 3.0        | 4.3        | 5.2        | 0.6        | 2.2        | 3.9        | 1.9        | 2.5        | 3.3        | 1.1        | 2.2        | 3.1        | 3.1        | 3.5        | 4.1        | 0.4        | 2.5        | 4.4        | 0.01 |   |
| I4                  | -14.1      | -17.5      | -19.0      | -16.4      | -17.4      | -18.8      | -15.7      | -16.1      | -17.4      | -18.8      | -19.2      | -21.2      | -17.2      | -20.0      | -22.4      | -17.1      | -19.8      | -21.8      | -16.4      | -18.6      | -22.1      | -17.5      | -18.7      | -18.8      | 0.01 |   |

Table S2: The relative energy ( $\Delta E$  in kcal/mol), enthalpy ( $\Delta H$  in kcal/mol) and Gibbs free energy ( $\Delta G$  in kcal/mol) for the reaction of I1 with O<sub>2</sub> and I5 with HO<sub>2</sub> and NO radicals calculated at M06-2X, w-B97XD, MPW1K, UCCSD(T) and RCCSD(T) with 6-311++G(d,p) basis set and CBS-QB3 and G3B3 and ROCBS-QB3 methods. T1-diagnostic value (T1) for the reactive species calculated at RCCSD(T)/6-311++(d,p) method.

| Species            | M06-2X     |            |            | w-B97XD    |            |            | MPW1K      |            |            | UCCSD(T)   |            |            | CBS-QB3    |            |            | G3B3       |            |            | ROCBS-QB3  |            |            | RCCSD(T)   |            |            |      |      |
|--------------------|------------|------------|------------|------------|------------|------------|------------|------------|------------|------------|------------|------------|------------|------------|------------|------------|------------|------------|------------|------------|------------|------------|------------|------------|------|------|
|                    | $\Delta E$ | $\Delta H$ | $\Delta G$ | $\Delta E$ | $\Delta H$ | $\Delta G$ | $\Delta E$ | $\Delta H$ | $\Delta G$ | $\Delta E$ | $\Delta H$ | $\Delta G$ | $\Delta E$ | $\Delta H$ | $\Delta G$ | $\Delta E$ | $\Delta H$ | $\Delta G$ | $\Delta E$ | $\Delta H$ | $\Delta G$ | $\Delta E$ | $\Delta H$ | $\Delta G$ | T1   |      |
| I1+O <sub>2</sub>  | 0          | 0          | 0          | 0          | 0          | 0          | 0          | 0          | 0          | 0          | 0          | 0          | 0          | 0          | 0          | 0          | 0          | 0          | 0          | 0          | 0          | 0          | 0          | 0          | 0    | 0.01 |
| I5                 | -31.5      | -33.1      | -34.4      | -30.3      | -32.4      | -34.9      | -32.6      | -33.6      | -36.6      | -32.6      | -34.1      | -36.7      | -33.9      | -35.7      | -37.4      | -34.5      | -35.1      | -36.6      | -33.6      | -35.2      | -37.3      | -31.8      | -33.6      | -35.7      | 0.02 |      |
| I5+HO <sub>2</sub> | 0          | 0          | 0          | 0          | 0          | 0          | 0          | 0          | 0          | 0          | 0          | 0          | 0          | 0          | 0          | 0          | 0          | 0          | 0          | 0          | 0          | 0          | 0          | 0          | 0    | -    |
| RC2                | -11.5      | -13.3      | -15.7      | -10.4      | -11.8      | -13.1      | -9.8       | -11.2      | -12.4      | -13.6      | -15.7      | -17.5      | -14.0      | -15.9      | -17.2      | -14.8      | -16.1      | -18.2      | -12.7      | -15.1      | -17.1      | -12.6      | -14.9      | -16.6      | 0.01 |      |
| TS5                | 2.4        | 4.5        | 6.9        | 3.4        | 6.1        | 7.5        | 4.10       | 6.8        | 8.1        | 1.8        | 3.2        | 5.4        | 2.9        | 5.1        | 8.3        | 3.0        | 5.8        | 8.9        | 3.1        | 5.8        | 8.4        | 2.3        | 3.8        | 5.9        | 0.01 |      |
| PC1                | -41.8      | -44.5      | -47.3      | -40.5      | -41.8      | -43.4      | -41.8      | -42.7      | -43.0      | -42.1      | -44.1      | -46.2      | -44.5      | -46.3      | -47.9      | -43.4      | -46.2      | -48.8      | -43.6      | -45.6      | -47.9      | -41.9      | -43.6      | -45.2      | 0.02 |      |
| P1+O <sub>2</sub>  | -29.2      | -31.6      | -34.8      | -28.5      | -29.7      | -31.1      | -29.3      | -30.5      | 31.8       | -30.4      | -32.7      | -35.0      | -31.5      | -33.5      | -35.6      | -32.0      | -34.5      | -37.1      | -31.1      | -33.1      | -35.6      | -30.1      | -31.9      | -34.4      | 0.03 |      |
| I5+NO              | 0          | 0          | 0          | 0          | 0          | 0          | 0          | 0          | 0          | 0          | 0          | 0          | 0          | 0          | 0          | 0          | 0          | 0          | 0          | 0          | 0          | 0          | 0          | 0          | 0    | 0.02 |
| I6                 | -36.4      | -37.6      | -39.8      | -34.7      | -36.2      | -38.6      | -35.4      | -36.7      | -38.8      | -35.7      | -36.2      | -37.5      | -37.6      | -38.4      | -41.4      | -38.6      | -39.7      | -41.8      | -36.8      | -38.4      | -41.3      | -34.7      | -35.4      | -36.8      | 0.02 |      |
| TS6                | 5.8        | 8.5        | 9.1        | 6.5        | 7.4        | 8.2        | 5.1        | 8.45       | 9.2        | 4.3        | 7.5        | 8.5        | 3.8        | 6.6        | 7.2        | 4.4        | 7.2        | 8.3        | 4.1        | 7.1        | 7.8        | 4.6        | 8.3        | 9.3        | 0.01 |      |
| I7+NO <sub>2</sub> | -39.4      | -38.7      | -37.6      | -37.5      | -38.2      | -39.7      | -40.2      | -37.6      | -38.5      | -38.6      | -39.4      | -40.6      | -40.6      | -39.7      | -40.4      | -41.2      | -40.2      | -39.6      | -39.8      | -39.2      | -40.0      | -37.5      | -38.8      | -39.5      | 0.01 |      |
| I7+O <sub>2</sub>  | 0          | 0          | 0          | 0          | 0          | 0          | 0          | 0          | 0          | 0          | 0          | 0          | 0          | 0          | 0          | 0          | 0          | 0          | 0          | 0          | 0          | 0          | 0          | 0          | 0    | -    |
| RC3                | -9.4       | -11.7      | -13.6      | -8.3       | -10.5      | -12.4      | -9.8       | -11.0      | -13.7      | -11.6      | -13.2      | -15.2      | -12.1      | -14.3      | -16.7      | -12.5      | -14.8      | -16.3      | -11.4      | -14.1      | -16.5      | -11.2      | -12.6      | -14.2      | 0.03 |      |
| TS7                | 4.4        | 6.8        | 8.6        | 5.1        | 6.4        | 7.7        | 5.7        | 6.8        | 7.1        | 4.7        | 6.0        | 7.3        | 4.4        | 5.4        | 6.4        | 4.1        | 5.8        | 6.4        | 4.9        | 5.5        | 6.6        | 5.2        | 5.50       | 7.8        | 0.02 |      |
| PC2                | -35.7      | -38.5      | -40.3      | -36.3      | -37.8      | -38.7      | -36.9      | -37.5      | -39.9      | -36.6      | -39.2      | -41.5      | -35.5      | -40.8      | -42.9      | -36.7      | -41.5      | -42.9      | -34.7      | -40.6      | -42.5      | -35.4      | -38.4      | -40.7      | 0.03 |      |
| P2+HO <sub>2</sub> | -28.9      | -30.6      | -32.5      | -27.1      | -29.5      | -31.6      | -28.4      | -29.8      | -31.5      | -30.4      | -32.7      | -33.8      | -31.0      | -33.1      | -35.3      | -31.6      | -33.4      | -35.1      | -31        | -33.1      | -35.3      | -29.9      | -32.1      | -34.8      | 0.02 |      |

Table S3: The relative energy ( $\Delta E$  in kcal/mol), relative enthalpy ( $\Delta H$  in kcal/mol) and Gibbs free energy ( $\Delta G$  in kcal/mol) for the reaction of I4 with O<sub>2</sub> and subsequent reactions calculated at M06-2X, w-B97XD, MPW1K, RCCSD(T) and UCCSD(T) with 6-311++G(d,p) basis set and CBS-QB3, G3B3 and ROCBS-QB3 methods. T1-diagonestic value (T1) for the reactive species calculated at RCCSD(T)/6-311++(d,p) method.

| Species            | M06-2X     |            |            | w-B97XD    |            |            | MPW1K      |            |            | UCCSD(T)   |            |            | CBS-QB3    |            |            | G3B3       |            |            | ROCBS-QB3  |            |            | RCCSD(T)   |            |            |      |      |
|--------------------|------------|------------|------------|------------|------------|------------|------------|------------|------------|------------|------------|------------|------------|------------|------------|------------|------------|------------|------------|------------|------------|------------|------------|------------|------|------|
|                    | $\Delta E$ | $\Delta H$ | $\Delta G$ | $\Delta E$ | $\Delta H$ | $\Delta G$ | $\Delta E$ | $\Delta H$ | $\Delta G$ | $\Delta E$ | $\Delta H$ | $\Delta G$ | $\Delta E$ | $\Delta H$ | $\Delta G$ | $\Delta E$ | $\Delta H$ | $\Delta G$ | $\Delta E$ | $\Delta H$ | $\Delta G$ | $\Delta E$ | $\Delta H$ | $\Delta G$ | T1   |      |
| I4+O <sub>2</sub>  | 0          | 0          | 0          | 0          | 0          | 0          | 0          | 0          | 0          | 0          | 0          | 0          | 0          | 0          | 0          | 0          | 0          | 0          | 0          | 0          | 0          | 0          | 0          | 0          | 0    | 0.01 |
| RC4                | -2.3       | -4.8       | -7.2       | -2.0       | -3.4       | -5.6       | -3.0       | -4.7       | -6.1       | -3.5       | -5.8       | -8.14      | -4.7       | -6.1       | -9.1       | -5.1       | -7.8       | -10.0      | -4.5       | -5.6       | -8.6       | -2.9       | -4.6       | -7.5       | 0.01 |      |
| TS8                | 1.8        | 3.1        | 5.4        | 2.3        | 4.3        | 6.9        | 2.7        | 5.1        | 7.3        | 1.3        | 2.5        | 3.6        | 1.0        | 2.6        | 3.5        | 0.5        | 2.0        | 3.2        | 1.4        | 3.2        | 4.1        | 1.5        | 2.8        | 4.2        | 0.03 |      |
| PC3                | -43.2      | -46.4      | -49.8      | -42.6      | -44.7      | -47.2      | -43.1      | -45.2      | -48.4      | -44.6      | -47.8      | -50.9      | -45.1      | -48.6      | -51.5      | -46.0      | -49.3      | -52.2      | -39.8      | -47.6      | -50.7      | -43.4      | -47.1      | -50.1      | 0.03 |      |
| P3+HO <sub>2</sub> | -32.2      | -34.8      | -37.5      | -31.1      | -33.2      | -36.8      | -34.7      | -36.4      | -37.1      | -37.2      | -38.5      | -39.1      | -37.5      | -38.6      | -39.8      | -35.1      | -37.1      | -40.3      | -37.1      | -37.8      | -39.3      | -36.3      | -37.9      | -38.3      | 0.04 |      |
| I8                 | -52.6      | -54.2      | -42.9      | -52.5      | -53.3      | -54.9      | -51.3      | -52.3      | -54.8      | -53.5      | -56.3      | -57.0      | -53.3      | -55.7      | -57.4      | -55.2      | -56.9      | -58.2      | -52.8      | -55.1      | -56.6      | -52.8      | -55.4      | -56.4      | 0.02 |      |
| TS9                | 9.7        | 11.4       | 12.1       | 10.3       | 11.6       | 12.8       | 9.1        | 10.4       | 11.3       | 8.7        | 9.66       | 10.1       | 8.7        | 9.6        | 10.4       | 8.8        | 10.1       | 11.3       | 9.2        | 10.1       | 10.8       | 8.6        | 9.8        | 10.7       | 0.02 |      |
| I9                 | -37.3      | -40.1      | -41.5      | -36.7      | -38.9      | -39.5      | -36.9      | -38.4      | -39.7      | -35.2      | -38.3      | -40.6      | -38.3      | -42.5      | -43.5      | -39.9      | -42.8      | -44.3      | -37.9      | -41.7      | -43.2      | -34.1      | -37.2      | -39.2      | 0.02 |      |
| TS10               | 14.6       | 15.1       | 16.5       | 16.0       | 17.5       | 18.4       | 15.8       | 16.6       | 18.3       | 13.3       | 14.3       | 15.9       | 12.1       | 13.4       | 14.6       | 15.4       | 16.8       | 14.7       | 12.6       | 13.8       | 15.1       | 13.7       | 14.7       | 16.4       | 0.02 |      |
| I10                | -25.7      | -27.2      | -29.8      | -23.5      | -25.0      | -26.9      | -24.4      | -25.8      | -27.2      | -28.3      | -27.5      | -28.3      | -23.6      | -24.3      | -28.4      | -30.4      | -31.2      | -30.8      | -23.2      | -23.6      | -27.7      | -26.9      | -26.4      | -27.4      | 0.02 |      |
| TS11               | 16.8       | 18.4       | 19.1       | 17.6       | 18.9       | 20.3       | 16.3       | 17.7       | 19.1       | 14.5       | 16.8       | 18.1       | 15.6       | 16.8       | 17.6       | 14.0       | 15.3       | 17.0       | 16.2       | 17.4       | 17.9       | 15.2       | 17.1       | 19.2       | 0.02 |      |
| I11                | -23.6      | -26.7      | -27.6      | -22.5      | -23.1      | -25.0      | -24.1      | -25.2      | -26.3      | -26.9      | -26.4      | -27.9      | -27.1      | -28.1      | -30.2      | -28.2      | -29.5      | -30.5      | -26.5      | -27.6      | -29.8      | -25.6      | -25.2      | -27.4      | 0.01 |      |
| I9+O <sub>2</sub>  | 0          | 0          | 0          | 0          | 0          | 0          | 0          | 0          | 0          | 0          | 0          | 0          | 0          | 0          | 0          | 0          | 0          | 0          | 0          | 0          | 0          | 0          | 0          | 0          | 0.02 |      |
| TS12               | 14.7       | 16.6       | 17.5       | 15.3       | 16.5       | 17.8       | 14.5       | 15.6       | 16.0       | 12.3       | 13.9       | 15.4       | 14         | 15         | 17.9       | 13.2       | 14.4       | 13         | 13.7       | 15.5       | 18.4       | 12.8       | 14.6       | 16.3       | 0.03 |      |
| I12                | -29.9      | -31.2      | -33.9      | -28.1      | -30.1      | -31.5      | -30.1      | -32.3      | -33.7      | -31.3      | -33.5      | -35.1      | -31.2      | -33.8      | -34.8      | -32.4      | -34.3      | -36        | -30.4      | -33.2      | -34.3      | -30.7      | -32.5      | -33.8      | 0.03 |      |

Table S4: The relative energy ( $\Delta E$  in kcal/mol) relative enthalpy ( $\Delta H$  in kcal/mol) and Gibbs free energy ( $\Delta G$  in kcal/mol) for the reaction of I12 with HO<sub>2</sub> and NO radicals calculated at M06-2X, w-B97XD, MPW1K, UCCSD(T) and RCCSD(T) with 6-311++G(d,p) basis set and CBS-QB3, G3B3 and ROCBS-QB3 methods. T1-diagonestic value (T1) for the reactive species calculated at RCCSD(T)/6-311++(d,p) method.

| Species             | M06-2X     |            |            | w-B97XD    |            |            | MPW1K      |            |            | UCCSD(T)   |            |            | CBS-QB3    |            |            | G3B3       |            |            | ROCBS-QB3  |            |            | RCCSD(T)   |            |            |      |
|---------------------|------------|------------|------------|------------|------------|------------|------------|------------|------------|------------|------------|------------|------------|------------|------------|------------|------------|------------|------------|------------|------------|------------|------------|------------|------|
|                     | $\Delta E$ | $\Delta H$ | $\Delta G$ | $\Delta E$ | $\Delta H$ | $\Delta G$ | $\Delta E$ | $\Delta H$ | $\Delta G$ | $\Delta E$ | $\Delta H$ | $\Delta G$ | $\Delta E$ | $\Delta H$ | $\Delta G$ | $\Delta E$ | $\Delta H$ | $\Delta G$ | $\Delta E$ | $\Delta H$ | $\Delta G$ | $\Delta E$ | $\Delta H$ | $\Delta G$ | T1   |
| I12+HO <sub>2</sub> | 0          | 0          | 0          | 0          | 0          | 0          | 0          | 0          | 0          | 0          | 0          | 0          | 0          | 0          | 0          | 0          | 0          | 0          | 0          | 0          | 0          | 0          | 0          | 0          | -    |
| RC5                 | -6.1       | -8.5       | -11.4      | -5.4       | -7.4       | -10.6      | -6.0       | -9.0       | -11.8      | -7.3       | -10.2      | -13.8      | -8.4       | -10.0      | -12.9      | -8.9       | -11.5      | -13.7      | -7.9       | -9.8       | -11.8      | -6.5       | -9.5       | -12.6      | 0.02 |
| TS13                | 1.8        | 4.3        | 6.6        | 2.1        | 5.4        | 7.8        | 2.9        | 4.9        | 7.6        | 1.3        | 2.9        | 5.8        | 0.9        | 3          | 4.2        | 0.5        | 2.1        | 3.6        | 1.2        | 3.1        | 5.2        | 2.1        | 3.7        | 6.6        | 0.02 |
| PC4                 | -42.0      | -44.2      | -47.4      | -41.8      | -43.1      | -46.1      | -42.3      | -45.2      | -48.0      | -44.5      | -47.8      | -49.2      | -45.3      | -48.5      | -50.6      | -44.1      | -46.2      | -49.2      | -44.1      | -47.9      | -49.7      | -39.7      | -46.4      | -48.5      | 0.03 |
| P4+O <sub>2</sub>   | -28.2      | -30.8      | -33.5      | -27.0      | -29.5      | -32.3      | -28.1      | -30.4      | -32.8      | -29.9      | -31.9      | -34.1      | -30.1      | -32.6      | -35.7      | -31.2      | -33.6      | -36.2      | -29.8      | -32.3      | -34.5      | -29.1      | -31.3      | -33.4      | 0.03 |
| I12+NO              | 0          | 0          | 0          | 0          | 0          | 0          | 0          | 0          | 0          | 0          | 0          | 0          | 0          | 0          | 0          | 0          | 0          | 0          | 0          | 0          | 0          | 0          | 0          | 0          | 0.02 |
| I13                 | -33.8      | -34.6      | -36.9      | -34.3      | -35.5      | -37.2      | -33.7      | -34.1      | -35.6      | -34.4      | -36.6      | -38.8      | -36.4      | -37.6      | -39.5      | -36.8      | -37.9      | -39.8      | -35.1      | -37.4      | -39.2      | -33.8      | -37.5      | -37.9      | 0.02 |
| TS14                | 7.7        | 9.6        | 11.0       | 10.3       | 12.7       | 13.8       | 10.5       | 11.3       | 13.4       | 8.5        | 9.8        | 11.5       | 8.1        | 10.2       | 11.5       | 8.5        | 9.9        | 10.7       | 8.5        | 10.5       | 11.3       | 9.6        | 9.1        | 12.4       | 0.02 |
| I14+NO <sub>2</sub> | -36        | -37        | -38.6      | -31.9      | -34.1      | -36.7      | -32.9      | -34.5      | -37.7      | -34.4      | -36.0      | -38.1      | -35.5      | -39.1      | -41.5      | -35.7      | -37.3      | -40.7      | -34.1      | -39.1      | -41.4      | -33.6      | -35.5      | -37.6      | 0.01 |
| I14+O <sub>2</sub>  | 0          | 0          | 0          | 0          | 0          | 0          | 0          | 0          | 0          | 0          | 0          | 0          | 0          | 0          | 0          | 0          | 0          | 0          | 0          | 0          | 0          | 0          | 0          | 0          | 0.02 |
| RC6                 | -7.8       | -10.8      | -13.5      | -8.5       | -9.9       | -12.0      | -6.53      | -8.5       | -11.9      | -9.9       | -12.3      | -14.7      | -10.4      | -13        | -15.2      | -9.9       | -13.6      | -16        | -8.6       | -13.4      | -15.5      | -9.1       | -11.6      | -13.3      | 0.02 |
| TS15                | 2.1        | 3.6        | 6.2        | 3.8        | 5.1        | 6.3        | 3.7        | 5.4        | 6.8        | 1.7        | 2.6        | 4.4        | 1.3        | 2.3        | 3.6        | 1.9        | 2.8        | 4.5        | 1.9        | 2.57       | 4.4        | 2.2        | 3.1        | 5.4        | 0.02 |
| PC5                 | -32.5      | -35.3      | -38.0      | -31.0      | -33.9      | -36.7      | -33.2      | -35.8      | -39.1      | -34.1      | -37.5      | -40        | -35.1      | -37.9      | -40.5      | -35.2      | -38.0      | -41.1      | -34.7      | -37.1      | -39.9      | -33.5      | -36.8      | -39.3      | 0.03 |
| P5+HO <sub>2</sub>  | -26.9      | -29.4      | -31.6      | -25.1      | -27.2      | -29.8      | -27.0      | -30.6      | -31.9      | -28.5      | -30.8      | -32.3      | -29.3      | -32        | -31.3      | -28.6      | -31.4      | -34.6      | -29.2      | -32.1      | -33.3      | -27.7      | -31.3      | -31.5      | 0.02 |
| I14                 | 0          | 0          | 0          | 0          | 0          | 0          | 0          | 0          | 0          | 0          | 0          | 0          | 0          | 0          | 0          | 0          | 0          | 0          | 0          | 0          | 0          | 0          | 0          | 0          | 0.03 |
| TS16                | 13.5       | 15.6       | 16.3       | 14.6       | 15.2       | 16.6       | 14.0       | 15.4       | 16.7       | 11.2       | 13.7       | 15.2       | 11.6       | 13.8       | 14.4       | 12.7       | 14.2       | 16.5       | 12.3       | 14.3       | 14.6       | 10.4       | 12.9       | 15.8       | 0.01 |
| I15                 | -23.4      | -25.4      | -27.2      | -22.7      | -24.6      | -26.8      | -24.2      | -25.3      | -26.4      | -25.3      | -27.4      | -28.8      | -26.5      | -27.2      | -28.5      | -27.5      | -28.4      | -29.6      | -26.1      | -26.3      | -28.2      | -24.8      | -26.8      | -27.2      | 0.02 |
| TS17                | 15         | 17.8       | 19         | 15.6       | 17.1       | 18.6       | 16.2       | 17.5       | 18.4       | 13.6       | 15.9       | 17.1       | 12.9       | 14.6       | 16.3       | 13.6       | 15.3       | 18         | 13.8       | 15.3       | 16.5       | 14.2       | 16.5       | 17.6       | 0.02 |
| P6+I16              | -18.4      | -19.3      | -20.5      | -16.8      | -18.4      | -19.3      | -17.4      | -18.9      | -20.5      | -19.3      | -20.1      | -22.5      | -21.8      | -23.2      | -24.4      | -20.6      | -21.6      | -23.8      | -21.2      | -22.1      | -24        | -18.7      | -19.5      | -21.7      | 0.03 |
| I16+O <sub>2</sub>  | 0          | 0          | 0          | 0          | 0          | 0          | 0          | 0          | 0          | 0          | 0          | 0          | 0          | 0          | 0          | 0          | 0          | 0          | 0          | 0          | 0          | 0          | 0          | 0          | -    |
| RC7                 | -4.3       | -6.6       | -8.8       | -3.5       | -5.1       | -7.4       | -4.0       | -6.0       | -7.2       | -5.1       | -7.9       | -10.0      | -6.3       | -8.9       | -10.9      | -7         | -9.1       | -11.5      | -5.7       | -8.2       | -10.1      | -4.5       | -7.2       | -9.1       | 0.02 |
| TS18                | 2.5        | 4.1        | 6.7        | 3.5        | 5.5        | 7.7        | 3.0        | 5.2        | 8.4        | 1.7        | 2.3        | 4.6        | 1.2        | 2.4        | 3.9        | 1.1        | 2.7        | 4.1        | 1.7        | 3.4        | 4.8        | 2.3        | 2.8        | 5.3        | 0.02 |
| PC6                 | -49.3      | -51.8      | -54.1      | -48.5      | -50.8      | -53.3      | -47.9      | -49.5      | -52.9      | -50.6      | -52.2      | -55.5      | -52.0      | -54.3      | -56.5      | -52.8      | -54.6      | -57.3      | -51.1      | -53.8      | -55.4      | -49.6      | -51.6      | -54.8      | 0.03 |
| P7+HO <sub>2</sub>  | -41.6      | -43.5      | -45.7      | -40.1      | -42.2      | -44.6      | -39.8      | -41.7      | -43.7      | -42.9      | -45.1      | -47.2      | -43.6      | -46.0      | -47.6      | -44.2      | -46.1      | -48.2      | -42.7      | -45.5      | -46.8      | -42.1      | -44.3      | -46.5      | 0.03 |

Table S5: The TST, TST (SCT), CVT and CVT (SCT) rate constants (in  $\text{cm}^3\text{molecule}^{-1}\text{s}^{-1}$ ) for the initial H-abstraction reaction (I1 and I2) and OH addition (I3 and I4) reactions of 135-TMB with OH radical.

| Temp<br>(in K) | I1                           |                              |                                       |                                       | I2                           |                              |                                       |                              | I3                           |                              |                                       |                                       | I4                           |                              |                                       |                                       |
|----------------|------------------------------|------------------------------|---------------------------------------|---------------------------------------|------------------------------|------------------------------|---------------------------------------|------------------------------|------------------------------|------------------------------|---------------------------------------|---------------------------------------|------------------------------|------------------------------|---------------------------------------|---------------------------------------|
|                | TST<br>( $\times 10^{-15}$ ) | CVT<br>( $\times 10^{-15}$ ) | TST<br>(SCT)<br>( $\times 10^{-13}$ ) | CVT<br>(SCT)<br>( $\times 10^{-13}$ ) | TST<br>( $\times 10^{-16}$ ) | CVT<br>( $\times 10^{-16}$ ) | TST<br>(SCT)<br>( $\times 10^{-14}$ ) | CVT<br>( $\times 10^{-14}$ ) | TST<br>( $\times 10^{-14}$ ) | CVT<br>( $\times 10^{-14}$ ) | TST<br>(SCT)<br>( $\times 10^{-13}$ ) | CVT<br>(SCT)<br>( $\times 10^{-13}$ ) | TST<br>( $\times 10^{-13}$ ) | CVT<br>( $\times 10^{-13}$ ) | TST<br>(SCT)<br>( $\times 10^{-12}$ ) | CVT<br>(SCT)<br>( $\times 10^{-12}$ ) |
| 250            | 2.2                          | 1.8                          | 2.7                                   | 2.3                                   | 0.06                         | 0.05                         | 1.3                                   | 1.0                          | 0.3                          | 0.3                          | 6.5                                   | 5.8                                   | 0.7                          | 0.7                          | 7.4                                   | 6.9                                   |
| 258            | 2.7                          | 2.4                          | 3.4                                   | 3.1                                   | 0.08                         | 0.07                         | 2.4                                   | 1.9                          | 0.6                          | 0.4                          | 7.2                                   | 6.4                                   | 0.9                          | 0.8                          | 8.9                                   | 7.5                                   |
| 268            | 3.3                          | 3.0                          | 4.2                                   | 3.8                                   | 0.1                          | 0.09                         | 3.7                                   | 3.0                          | 0.8                          | 0.7                          | 8.0                                   | 7.2                                   | 1.3                          | 1.0                          | 10.0                                  | 8.7                                   |
| 278            | 3.9                          | 3.7                          | 4.9                                   | 4.5                                   | 0.4                          | 0.2                          | 4.9                                   | 4.2                          | 0.9                          | 0.8                          | 8.7                                   | 8.1                                   | 2.3                          | 2.1                          | 11.6                                  | 9.6                                   |
| 288            | 4.5                          | 4.2                          | 5.7                                   | 5.2                                   | 0.5                          | 0.4                          | 5.8                                   | 5.3                          | 1.2                          | 1.1                          | 9.4                                   | 8.9                                   | 3.1                          | 2.7                          | 12.6                                  | 10.4                                  |
| 298            | 5.2                          | 4.9                          | 6.5                                   | 6.0                                   | 0.7                          | 0.6                          | 7.0                                   | 6.5                          | 2.1                          | 1.8                          | 10.3                                  | 9.6                                   | 3.8                          | 3.5                          | 13.9                                  | 11.8                                  |
| 308            | 6.3                          | 5.7                          | 7.3                                   | 6.9                                   | 0.9                          | 0.8                          | 8.4                                   | 7.9                          | 3.0                          | 2.6                          | 11.0                                  | 10.4                                  | 4.5                          | 4.3                          | 15.1                                  | 13.0                                  |
| 318            | 7.0                          | 6.6                          | 8.0                                   | 7.7                                   | 1.8                          | 1.4                          | 9.4                                   | 8.3                          | 3.5                          | 3.2                          | 11.9                                  | 11.1                                  | 5.2                          | 4.9                          | 16.3                                  | 14.7                                  |
| 328            | 7.8                          | 7.3                          | 8.8                                   | 8.4                                   | 2.6                          | 2.2                          | 10.2                                  | 9.8                          | 4.8                          | 4.3                          | 12.7                                  | 12.0                                  | 6.2                          | 5.7                          | 17.9                                  | 16.1                                  |
| 338            | 8.6                          | 8.0                          | 9.3                                   | 9                                     | 3.4                          | 2.9                          | 11.4                                  | 10.7                         | 5.8                          | 5.3                          | 13.5                                  | 12.9                                  | 7.1                          | 6.6                          | 19.03                                 | 17.5                                  |
| 348            | 9.2                          | 8.8                          | 10.3                                  | 9.5                                   | 4.6                          | 4.0                          | 12.5                                  | 11.3                         | 6.5                          | 6.1                          | 14.2                                  | 13.4                                  | 7.9                          | 7.4                          | 20.3                                  | 19.2                                  |
| 350            | 9.3                          | 9.0                          | 10.5                                  | 10.5                                  | 4.9                          | 4.4                          | 12.8                                  | 12.8                         | 7.0                          | 6.4                          | 14.8                                  | 14.7                                  | 8.1                          | 7.9                          | 20.6                                  | 19.7                                  |
